# Supplementary material
Source: PubMed Central journal article supplement (PMC7138273)

Figure S1. miR-106b-5p and NOR1 level in PSMCs. (A) PSMCs were treated with agomiR-106b-5p, antagomiR-106b-5p, agomiR-NC or antagomiR-NC for 24 h. And then the level of miR-106b-5p was measured by the RT-qPCR analysis. After 48 h transfected with NOR1 lentiviral activation particles or NC particles, transfection efficiency for NOR1 overexpression was assessed by (B) RT-qPCR and (C) western blotting. Data are presented as the mean  $\pm$  standard error of the mean. n=3. Ctrl control; NC, negative control; Act, activation; RT-q, reverse transcription-quantitative; miR, microRNA; PSMCs, pulmonary artery smooth muscle cells.

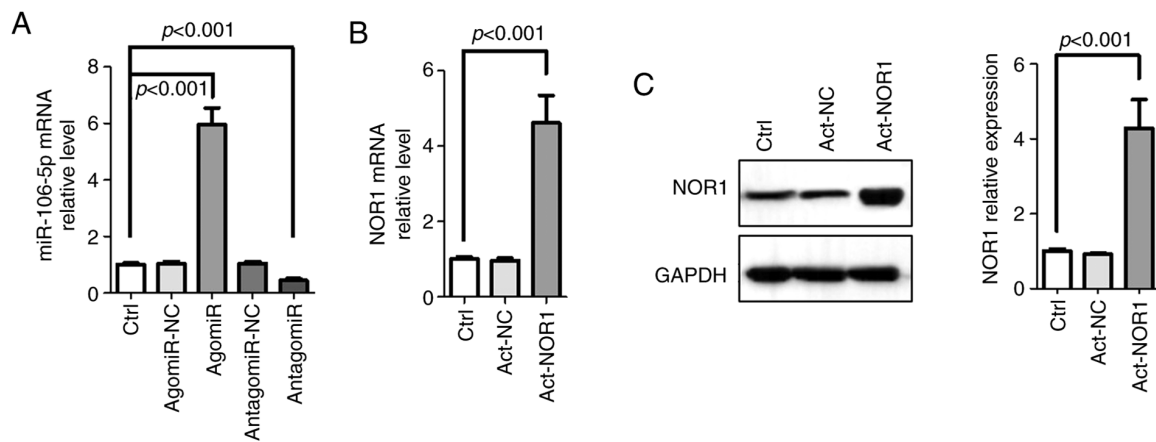

Supplement: Supplementary_Data.pdf [file Supplementary_Data.pdf]
